# Supplementary material for: The Association of Redox Regulatory Drug Target Genes with Psychiatric Disorders: A Mendelian Randomization Study
Source: Antioxidants (Basel). 2024 Mar 27;13(4):398. doi: 10.3390/antiox13040398 (PMC11047424; doi:10.3390/antiox13040398)
Supplement: Supplementary file 1 [file antioxidants-13-00398-s001.zip › Supplementary Materials 1 STROBE-MR-checklist-fillable.pdf]

# STROBE-MR checklist of recommended items to address in reports of Mendelian randomization studies<sup>1 2</sup>

| Item No.            | Section                   | Checklist item                                                                                                                                                                                                                            | Page No. | Relevant text from manuscript                                                                                                                                                                                                                                                                                                                                                                                                                                                                                                                                                                                                                                                                                                                                                                                                                                                                                                                                                                                                                                                                       |
|---------------------|---------------------------|-------------------------------------------------------------------------------------------------------------------------------------------------------------------------------------------------------------------------------------------|----------|-----------------------------------------------------------------------------------------------------------------------------------------------------------------------------------------------------------------------------------------------------------------------------------------------------------------------------------------------------------------------------------------------------------------------------------------------------------------------------------------------------------------------------------------------------------------------------------------------------------------------------------------------------------------------------------------------------------------------------------------------------------------------------------------------------------------------------------------------------------------------------------------------------------------------------------------------------------------------------------------------------------------------------------------------------------------------------------------------------|
| 1                   | <b>TITLE and ABSTRACT</b> | Indicate Mendelian randomization (MR) as the study's design in the title and/or the abstract if that is a main purpose of the study                                                                                                       | Page 1   | Association of Redox Regulatory Drug Target Genes with Psychiatric Disorders                                                                                                                                                                                                                                                                                                                                                                                                                                                                                                                                                                                                                                                                                                                                                                                                                                                                                                                                                                                                                        |
| <b>INTRODUCTION</b> |                           |                                                                                                                                                                                                                                           |          |                                                                                                                                                                                                                                                                                                                                                                                                                                                                                                                                                                                                                                                                                                                                                                                                                                                                                                                                                                                                                                                                                                     |
| 2                   | <b>Background</b>         | Explain the scientific background and rationale for the reported study. What is the exposure? Is a potential causal relationship between exposure and outcome plausible? Justify why MR is a helpful method to address the study question | Page 4-5 | <p>The brain is a lipid-rich organ, with enormous oxygen consumption, and lack of sufficient antioxidant barriers, which makes brain highly susceptible to oxidative stress imbalance. Back in the last century, the connection between unbalanced oxidative stress and various neuropsychiatric diseases has been found. Additionally, previous clinical trials revealed that some redox regulatory drugs (RRDs), such as N-Acetylcysteine (NAC) and allopurinol, can improve the symptom of psychiatric disorders (i.e., schizophrenia, depression, autism spectrum disorder), which meant that the drug targets of RRD might be the possible targets for psychiatric disorders.</p> <p>Randomized clinical trials (RCTs) are the golden criteria to explore a causal effect of numerous kinds of RRD treatment. However, these approaches are not suitable due the RCTs are expensive and uncertain. Mendelian randomization (MR) study provides a genetic approach which apply the genetic variants associated with an exposure as the instruments to make causal inference on the outcome.</p> |
| 3                   | <b>Objectives</b>         | State specific objectives clearly, including pre-specified causal hypotheses (if any). State that MR is a method that, under specific assumptions, intends to estimate causal effects                                                     | Page 5   | Aim to identify potential associations between RRD therapy and psychiatric disorders, the two-sample MR analyses were conducted by integrating brain-derived molecular quantitative trait loci (mRNA expression and protein abundance quantitative trait loci [QTL]) and genome-wide association study (GWAS) findings from large-scale psychiatric genetic studies. Cognitive dysfunction is a core symptom in the psychiatric disorders, and some antioxidants have a positive effect on preventing                                                                                                                                                                                                                                                                                                                                                                                                                                                                                                                                                                                               |

the risk of cognitive decline. To uncover the underlying mechanism on the causal effect of antioxidant target on psychiatric disorders, two-step MR analyses were performed by setting antioxidant levels and cognition function as mediators.

| METHODS |                                           |                                                                                                                                                                                                                                 |                                                                                                                                                                                                                                                                                                                               |
|---------|-------------------------------------------|---------------------------------------------------------------------------------------------------------------------------------------------------------------------------------------------------------------------------------|-------------------------------------------------------------------------------------------------------------------------------------------------------------------------------------------------------------------------------------------------------------------------------------------------------------------------------|
| 4       | <b>Study design and data sources</b>      | Present key elements of the study design early in the article. Consider including a table listing sources of data for all phases of the study. For each data source contributing to the analysis, describe the following:       | Supplementary material: Table S2                                                                                                                                                                                                                                                                                              |
|         | a)                                        | Setting: Describe the study design and the underlying population, if possible. Describe the setting, locations, and relevant dates, including periods of recruitment, exposure, follow-up, and data collection, when available. | NA                                                                                                                                                                                                                                                                                                                            |
|         | b)                                        | Participants: Give the eligibility criteria, and the sources and methods of selection of participants. Report the sample size, and whether any power or sample size calculations were carried out prior to the main analysis    | NA                                                                                                                                                                                                                                                                                                                            |
|         | c)                                        | Describe measurement, quality control and selection of genetic variants                                                                                                                                                         | NA                                                                                                                                                                                                                                                                                                                            |
|         | d)                                        | For each exposure, outcome, and other relevant variables, describe methods of assessment and diagnostic criteria for diseases                                                                                                   | NA                                                                                                                                                                                                                                                                                                                            |
|         | e)                                        | Provide details of ethics committee approval and participant informed consent, if relevant                                                                                                                                      | NA                                                                                                                                                                                                                                                                                                                            |
| 5       | <b>Assumptions</b>                        | Explicitly state the three core IV assumptions for the main analysis (relevance, independence and exclusion restriction) as well assumptions for any additional or sensitivity analysis                                         | Page 6<br><br>Three crucial assumptions of MR study are listed as follows: 1) a strong association between genetic instrumentals and target proteins, 2) independence of the instruments from confounding factors, and 3) instrumental variables (IVs) influence the psychiatric disorder risk only through the drug targets. |
| 6       | <b>Statistical methods: main analysis</b> | Describe statistical methods and statistics used                                                                                                                                                                                | Page 6-11                                                                                                                                                                                                                                                                                                                     |
|         | a)                                        | Describe how quantitative variables were handled in the analyses (i.e., scale, units, model)                                                                                                                                    | NA                                                                                                                                                                                                                                                                                                                            |
|         | b)                                        | Describe how genetic variants were handled in the analyses and, if applicable, how their weights were selected                                                                                                                  | Page 7-8                                                                                                                                                                                                                                                                                                                      |

|                |                                                     |                                                                                                                                                                                                                                                                                                                             |                            |
|----------------|-----------------------------------------------------|-----------------------------------------------------------------------------------------------------------------------------------------------------------------------------------------------------------------------------------------------------------------------------------------------------------------------------|----------------------------|
|                |                                                     | c) Describe the MR estimator (e.g. two-stage least squares, Wald ratio) and related statistics. Detail the included covariates and, in case of two-sample MR, whether the same covariate set was used for adjustment in the two samples                                                                                     | NA                         |
|                |                                                     | d) Explain how missing data were addressed                                                                                                                                                                                                                                                                                  | NA                         |
|                |                                                     | e) If applicable, indicate how multiple testing was addressed                                                                                                                                                                                                                                                               | NA                         |
| 7              | <b>Assessment of assumptions</b>                    | Describe any methods or prior knowledge used to assess the assumptions or justify their validity                                                                                                                                                                                                                            | Page 8-9                   |
| 8              | <b>Sensitivity analyses and additional analyses</b> | Describe any sensitivity analyses or additional analyses performed (e.g. comparison of effect estimates from different approaches, independent replication, bias analytic techniques, validation of instruments, simulations)                                                                                               | Page 9-10                  |
| 9              | <b>Software and pre-registration</b>                |                                                                                                                                                                                                                                                                                                                             | Page 9-10                  |
|                |                                                     | a) Name statistical software and package(s), including version and settings used                                                                                                                                                                                                                                            | Page 9-10                  |
|                |                                                     | b) State whether the study protocol and details were pre-registered (as well as when and where)                                                                                                                                                                                                                             | NA                         |
| <b>RESULTS</b> |                                                     |                                                                                                                                                                                                                                                                                                                             |                            |
| 10             | <b>Descriptive data</b>                             |                                                                                                                                                                                                                                                                                                                             |                            |
|                |                                                     | a) Report the numbers of individuals at each stage of included studies and reasons for exclusion. Consider use of a flow diagram                                                                                                                                                                                            | Page 7-8                   |
|                |                                                     | b) Report summary statistics for phenotypic exposure(s), outcome(s), and other relevant variables (e.g. means, SDs, proportions)                                                                                                                                                                                            | Page 7-8;<br>Table S3-S9   |
|                |                                                     | c) If the data sources include meta-analyses of previous studies, provide the assessments of heterogeneity across these studies                                                                                                                                                                                             | NA                         |
|                |                                                     | d) For two-sample MR: <ul style="list-style-type: none"> <li>i. Provide justification of the similarity of the genetic variant-exposure associations between the exposure and outcome samples</li> <li>ii. Provide information on the number of individuals who overlap between the exposure and outcome studies</li> </ul> | NA                         |
| 11             | <b>Main results</b>                                 |                                                                                                                                                                                                                                                                                                                             |                            |
|                |                                                     | a) Report the associations between genetic variant and exposure, and between genetic variant and outcome, preferably on an interpretable scale                                                                                                                                                                              | Page 12-13;<br>Table S3-S9 |

|                   |                                                     |                                                                                                                                                                                                                                        |             |
|-------------------|-----------------------------------------------------|----------------------------------------------------------------------------------------------------------------------------------------------------------------------------------------------------------------------------------------|-------------|
|                   | b)                                                  | Report MR estimates of the relationship between exposure and outcome, and the measures of uncertainty from the MR analysis, on an interpretable scale, such as odds ratio or relative risk per SD difference                           | Table S3-S9 |
|                   | c)                                                  | If relevant, consider translating estimates of relative risk into absolute risk for a meaningful time period                                                                                                                           | NA          |
|                   | d)                                                  | Consider plots to visualize results (e.g. forest plot, scatterplot of associations between genetic variants and outcome versus between genetic variants and exposure)                                                                  | Figure 2    |
| 12                | <b>Assessment of assumptions</b>                    |                                                                                                                                                                                                                                        |             |
|                   | a)                                                  | Report the assessment of the validity of the assumptions                                                                                                                                                                               | Page 12-13  |
|                   | b)                                                  | Report any additional statistics (e.g., assessments of heterogeneity across genetic variants, such as $I^2$ , Q statistic or E-value)                                                                                                  | NA          |
| 13                | <b>Sensitivity analyses and additional analyses</b> |                                                                                                                                                                                                                                        |             |
|                   | a)                                                  | Report any sensitivity analyses to assess the robustness of the main results to violations of the assumptions                                                                                                                          | Page 14-15  |
|                   | b)                                                  | Report results from other sensitivity analyses or additional analyses                                                                                                                                                                  | Page 14-16  |
|                   | c)                                                  | Report any assessment of direction of causal relationship (e.g., bidirectional MR)                                                                                                                                                     | NA          |
|                   | d)                                                  | When relevant, report and compare with estimates from non-MR analyses                                                                                                                                                                  | NA          |
|                   | e)                                                  | Consider additional plots to visualize results (e.g., leave-one-out analyses)                                                                                                                                                          | Figure 3    |
| <b>DISCUSSION</b> |                                                     |                                                                                                                                                                                                                                        |             |
| 14                | <b>Key results</b>                                  | Summarize key results with reference to study objectives                                                                                                                                                                               | Page 17     |
| 15                | <b>Limitations</b>                                  | Discuss limitations of the study, taking into account the validity of the IV assumptions, other sources of potential bias, and imprecision. Discuss both direction and magnitude of any potential bias and any efforts to address them | Page 19-20  |
| 16                | <b>Interpretation</b>                               |                                                                                                                                                                                                                                        |             |
|                   | a)                                                  | Meaning: Give a cautious overall interpretation of results in the context of their limitations and in comparison with other studies                                                                                                    | NA          |

|                          |                              |                                                                                                                                                                                                                                                                                                                                                         |            |
|--------------------------|------------------------------|---------------------------------------------------------------------------------------------------------------------------------------------------------------------------------------------------------------------------------------------------------------------------------------------------------------------------------------------------------|------------|
|                          |                              | b) Mechanism: Discuss underlying biological mechanisms that could drive a potential causal relationship between the investigated exposure and the outcome, and whether the gene-environment equivalence assumption is reasonable. Use causal language carefully, clarifying that IV estimates may provide causal effects only under certain assumptions | Page 17-19 |
|                          |                              | c) Clinical relevance: Discuss whether the results have clinical or public policy relevance, and to what extent they inform effect sizes of possible interventions                                                                                                                                                                                      | Page 20    |
| 17                       | <b>Generalizability</b>      | Discuss the generalizability of the study results (a) to other populations, (b) across other exposure periods/timings, and (c) across other levels of exposure                                                                                                                                                                                          | Page 20    |
| <b>OTHER INFORMATION</b> |                              |                                                                                                                                                                                                                                                                                                                                                         |            |
| 18                       | <b>Funding</b>               | Describe sources of funding and the role of funders in the present study and, if applicable, sources of funding for the databases and original study or studies on which the present study is based                                                                                                                                                     | Page 21    |
| 19                       | <b>Data and data sharing</b> | Provide the data used to perform all analyses or report where and how the data can be accessed, and reference these sources in the article. Provide the statistical code needed to reproduce the results in the article, or report whether the code is publicly accessible and if so, where                                                             | Page 21    |
| 20                       | <b>Conflicts of Interest</b> | All authors should declare all potential conflicts of interest                                                                                                                                                                                                                                                                                          | Page 21    |

This checklist is copyrighted by the Equator Network under the Creative Commons Attribution 3.0 Unported (CC BY 3.0) license.

1. Skrivankova VW, Richmond RC, Woolf BAR, Yarmolinsky J, Davies NM, Swanson SA, et al. Strengthening the Reporting of Observational Studies in Epidemiology using Mendelian Randomization (STROBE-MR) Statement. JAMA. 2021;under review.
2. Skrivankova VW, Richmond RC, Woolf BAR, Davies NM, Swanson SA, VanderWeele TJ, et al. Strengthening the Reporting of Observational Studies in Epidemiology using Mendelian Randomisation (STROBE-MR): Explanation and Elaboration. BMJ. 2021;375:n2233.
