# Supplementary material for: The Association of Redox Regulatory Drug Target Genes with Psychiatric Disorders: A Mendelian Randomization Study
Source: Antioxidants (Basel). 2024 Mar 27;13(4):398. doi: 10.3390/antiox13040398 (PMC11047424; doi:10.3390/antiox13040398)
Supplement: Supplementary file 1 [file antioxidants-13-00398-s001.zip › Supplementary Materials 1 Supplementary TableS1-S10.pdf]

| Table S1. Antioxidants target genes.      |                                                                                                                                                                                                                                                                                                                                                               |                                                  |                               |                                                                                                                                                                                                                                                                                                                                                                                                                                                                                                                                                                                                                                                                                                                                                                                                      |                                                                                                                                                                                                                                                                                                                                                                                                                                                                                                                                                |
|-------------------------------------------|---------------------------------------------------------------------------------------------------------------------------------------------------------------------------------------------------------------------------------------------------------------------------------------------------------------------------------------------------------------|--------------------------------------------------|-------------------------------|------------------------------------------------------------------------------------------------------------------------------------------------------------------------------------------------------------------------------------------------------------------------------------------------------------------------------------------------------------------------------------------------------------------------------------------------------------------------------------------------------------------------------------------------------------------------------------------------------------------------------------------------------------------------------------------------------------------------------------------------------------------------------------------------------|------------------------------------------------------------------------------------------------------------------------------------------------------------------------------------------------------------------------------------------------------------------------------------------------------------------------------------------------------------------------------------------------------------------------------------------------------------------------------------------------------------------------------------------------|
| Antioxidant Drugs                         | Mechanism of action                                                                                                                                                                                                                                                                                                                                           | ChEMBL                                           | Targets                       | Drug Bank                                                                                                                                                                                                                                                                                                                                                                                                                                                                                                                                                                                                                                                                                                                                                                                            | Targets                                                                                                                                                                                                                                                                                                                                                                                                                                                                                                                                        |
| N-Acetylcysteine (NAC)                    | Salvianolic acid B like resveratrol is an activator of SIRT1 and an inhibitor of NF- $\kappa$ B                                                                                                                                                                                                                                                               | NA                                               | NA                            | Glutathione synthetase, Cystine/glutamate transporter, Aminoacylase-1, Inhibitor of nuclear factor kappa-B kinase subunit beta, Inhibitor of nuclear factor kappa-B kinase subunit alpha, Glutamate receptor ionotropic, NMDA 1/2A/2B/2D/3A                                                                                                                                                                                                                                                                                                                                                                                                                                                                                                                                                          | GSS (stimulator), <i>SLC7A11</i> (activator), <i>ACY1</i> (substrate), <i>IKBK</i> (inhibitor), <i>CHUK</i> (inhibitor), <i>GRIN1</i> (activator), <i>GRIN2A</i> (activator), <i>GRIN2B</i> (activator), <i>GRIN2D</i> (activator), <i>GRIN3A</i> (activator)                                                                                                                                                                                                                                                                                  |
| Ginkgo biloba extract                     | Ginkgo biloba extract<br>(i) Scavenger of superoxide anion, hydroxyl radicals, peroxyl<br>(ii) Reduces the concentration of primary and secondary products of lipid peroxidation (diene conjugates, TBA-active products)<br>(iii) Induces the enzymatic activity of superoxide dismutase and catalase                                                         | NA                                               | NA                            | Sodium-dependent noradrenaline transporter, Phospholipase A2 membrane associated, Glycine receptor subunit alpha-1, Gamma-aminobutyric acid receptor subunit alpha-1/beta-2/gamma-2, Amine oxidase [flavin-containing] A, Nitric oxide synthase, inducible                                                                                                                                                                                                                                                                                                                                                                                                                                                                                                                                           | <i>SLC6A2</i> (inhibitor), <i>PLA2G2A</i> (inhibitor), <i>GLRA1</i> (antagonist), <i>GABRA1</i> (negative modulator), <i>GABRB2</i> (negative modulator), <i>GABRG2</i> (negative modulator), <i>MAOA</i> (inhibitor), <i>NOS2</i> (inhibitor)                                                                                                                                                                                                                                                                                                 |
| Selegiline                                | The antioxidant effect of selegiline may be associated with the protection of neurons from oxygen free radicals that are released as a result of MAO-B activity                                                                                                                                                                                               | Monoamine oxidase B                              | MAOB (inhibitor)              | Amine oxidase [flavin-containing] B, Amine oxidase [flavin-containing] A                                                                                                                                                                                                                                                                                                                                                                                                                                                                                                                                                                                                                                                                                                                             | MAOA (inhibitor), MAOB (inhibitor)                                                                                                                                                                                                                                                                                                                                                                                                                                                                                                             |
| Allopurinol                               | Allopurinol prevents the formation of free radicals:<br>(i) Inhibits the xanthine oxidase reaction, during which superoxide anion radical is actively formed                                                                                                                                                                                                  | Xanthine dehydrogenase                           | XDH (inhibitor)               | Xanthine dehydrogenase/oxidase                                                                                                                                                                                                                                                                                                                                                                                                                                                                                                                                                                                                                                                                                                                                                                       | XDH (inhibitor)                                                                                                                                                                                                                                                                                                                                                                                                                                                                                                                                |
| Vitamin E                                 | Vitamin E is a natural antioxidant that neutralizes free radicals:<br>(i) There is a transfer of hydrogen of the phenyl group to the peroxide radical<br>(ii) Performs structural function by interacting with phospholipids of biological membranes<br>(iii) Restores the oxidation product of tocopherol ( $\alpha$ -tocopheroxide) to $\alpha$ -tocopherol | NA                                               | NA                            | SEC14-like protein 4/3/2, Nuclear receptor subfamily 1 group I member 2, Protein kinase C beta/alpha type, Arachidonate 5-lipoxygenase, Diacylglycerol kinase alpha, Serine/threonine-protein phosphatase 2A catalytic subunit beta/alpha isoform                                                                                                                                                                                                                                                                                                                                                                                                                                                                                                                                                    | <i>SEC14L2</i> (NA), <i>SEC14L3</i> (NA), <i>SEC14L4</i> (NA), <i>NR1I2</i> (NA), <i>PRKCB</i> (NA), <i>PRKCA</i> (NA), <i>ALOX5</i> (NA), <i>DGKA</i> (NA), <i>PPP2CB</i> (NA), <i>PPP2CA</i> (NA)                                                                                                                                                                                                                                                                                                                                            |
| Vitamin C                                 | Vitamin C antioxidant activity:<br>(i) The formation of a redox pair of ascorbic acid/dehydroascorbic acid, restores the active form of vitamin E<br>(ii) Prevents or reverses the oxidation process of reduced glutathione (GSH) to its functionally inactive form (GSSG)                                                                                    | NA                                               | NA                            | Procollagen-lysine,2-oxoglutarate 5-dioxygenase 2/3, Phytanoyl-CoA dioxygenase peroxisomal, Gamma-butyrobetaine dioxygenase, Dopamine beta-hydroxylase, Peptidyl-glycine alpha-amidating monooxygenase, Prolyl 3-hydroxylase 1/2/3, Prolyl 4-hydroxylase subunit alpha-1, 2-oxoglutarate and iron-dependent oxygenase domain-containing protein 1/2, Alpha-ketoglutarate-dependent dioxygenase alkB homolog 2/3, Lysine-specific demethylase 5D, Procollagen-lysine,2-oxoglutarate 5-dioxygenase 1, Trimethyllysine dioxygenase, mitochondrial, Transmembrane prolyl 4-hydroxylase, Egl nine homolog 1/2/3                                                                                                                                                                                           | <i>PLOD2</i> (cofactor), <i>PLOD3</i> (cofactor), <i>PHYH</i> (cofactor), <i>BBOX1</i> (cofactor), <i>DBH</i> (cofactor), <i>PAM</i> (cofactor), <i>P3H1</i> (cofactor), <i>P3H2</i> (cofactor), <i>P3H3</i> (cofactor), <i>P4HA1</i> (cofactor), <i>OGFOD1</i> (cofactor), <i>OGFOD2</i> (cofactor), <i>ALKBH2</i> (activator), <i>ALKBH3</i> (activator), <i>KDM5D</i> (cofactor), <i>PLOD1</i> (cofactor), <i>TMLHE</i> (cofactor), <i>P4HTM</i> (cofactor), <i>EGLN1</i> (cofactor), <i>EGLN2</i> (cofactor), <i>EGLN3</i> (cofactor)      |
| Polysaturated fatty acids (PUFAs)/Omega-3 | The detailed mechanisms of action are mostly unknown, but PUFAs have anti-inflammatory and antiatherogenic effects                                                                                                                                                                                                                                            | NA                                               | NA                            | Peroxisome proliferator-activated receptor gamma, Peroxisome proliferator-activated receptor alpha, Sterol regulatory element-binding protein 1                                                                                                                                                                                                                                                                                                                                                                                                                                                                                                                                                                                                                                                      | <i>PPARG</i> (ligand), <i>PPARA</i> (activator), <i>SREBF1</i> (inhibitor)                                                                                                                                                                                                                                                                                                                                                                                                                                                                     |
| Curcumin                                  | Inhibit Keap1 protein through electrophilic modification, which leads to Nrf2 activation                                                                                                                                                                                                                                                                      | NA                                               | NA                            | Peroxisome proliferator-activated receptor gamma, Vitamin D3 receptor, Multidrug resistance-associated protein 5, Carbonyl reductase [NADPH] 1, Glutathione S-transferase P                                                                                                                                                                                                                                                                                                                                                                                                                                                                                                                                                                                                                          | <i>PPARG</i> (NA), <i>VDR</i> (NA), <i>ABCC5</i> (inhibitor), <i>CBR1</i> (NA), <i>GSTP1</i> (NA)                                                                                                                                                                                                                                                                                                                                                                                                                                              |
| Resveratrol                               | Resveratrol is<br>(i) An activator of NAD-dependent deacetylase sirtuin-1 (SIRT1), which activates the transcription factor FoxO<br>(ii) An inhibitor of NF- $\kappa$ B (anti-inflammatory effect)                                                                                                                                                            | NA                                               | NA                            | Ribosyldihydronicotinamide dehydrogenase [quinone], Casein kinase II subunit alpha, Prostaglandin G/H synthase 1/2, Arachidonate 15-lipoxygenase, Arachidonate 5-lipoxygenase, Aryl hydrocarbon receptor, Phosphatidylinositol 4-kinase type 2-beta, Integrin alpha-5/beta-3, Amyloid beta A4 protein, Alpha-synuclein, NAD-dependent protein deacetylase sirtuin-1, Estrogen receptor alpha, Melatonin receptor type 1A/1B, C-type lectin domain family 14 member A, Nuclear receptor subfamily 1 group I member 2/3, Solute carrier family 2, facilitated glucose transporter member 1, Carbonyl reductase [NADPH] 1, Peroxisome proliferator-activated receptor alpha/gamma, RAC-alpha serine/threonine-protein kinase, Far upstream element-binding protein 2, Tyrosine-tRNA ligase, cytoplasmic | <i>NQO2</i> (NA), <i>CSNK2A2</i> (NA), <i>PTGS2</i> (inhibitor), <i>PTGS1</i> (inhibitor), <i>ALOX15</i> (NA), <i>ALOX5</i> (NA), <i>AHR</i> (NA), <i>PI4K2B</i> (NA), <i>ITGA5</i> (NA), <i>ITGB3</i> (NA), <i>APP</i> (NA), <i>SNCA</i> (NA), <i>SIRT1</i> (NA), <i>ESR1</i> (NA), <i>MTNR1A</i> (NA), <i>MTNR1B</i> (NA), <i>CLEC14A</i> (NA), <i>NR1I2</i> (NA), <i>NR1I3</i> (NA), <i>SLC2A1</i> (NA), <i>CBR1</i> (inhibitor), <i>PPARG</i> (NA), <i>PPARA</i> (NA), <i>AKT1</i> (inhibitor), <i>FBP2</i> (NA), <i>YARS1</i> (inhibitor) |
| Metformin                                 | Activate FoxO3 via AMP-activated protein kinase activation                                                                                                                                                                                                                                                                                                    | Mitochondrial glycerol-3-phosphate dehydrogenase | GPD2                          | Electron transfer flavoprotein-ubiquinone oxidoreductase, mitochondrial, 5'-AMP-activated protein kinase subunit beta-1, Glycerol-3-phosphate dehydrogenase [NAD(+)] cytoplasmic                                                                                                                                                                                                                                                                                                                                                                                                                                                                                                                                                                                                                     | <i>ETFDH</i> (inhibitor), <i>PRKAB1</i> (inducer activator), <i>GPD1</i> (inhibitor)                                                                                                                                                                                                                                                                                                                                                                                                                                                           |
| Vitamin D                                 |                                                                                                                                                                                                                                                                                                                                                               | Vitamin D receptor                               | VDR                           | Vitamin D3 receptor, Vitamin D-binding protein                                                                                                                                                                                                                                                                                                                                                                                                                                                                                                                                                                                                                                                                                                                                                       | <i>VDR</i> (NA), <i>GC</i> (NA)                                                                                                                                                                                                                                                                                                                                                                                                                                                                                                                |
| Vitamin A                                 |                                                                                                                                                                                                                                                                                                                                                               | NA                                               | NA                            | Apolipoprotein D, Prostaglandin-H2 D-isomerase, Retinol dehydrogenase 12, 11-cis retinol dehydrogenase, Retinol dehydrogenase 13/12, Locoin retinol acyltransferase, Short-chain dehydrogenase/reductase 3, Aldehyde dehydrogenase family 1 member A3, All-trans-retinol 13,14-reductase, Retinol dehydrogenase 11, Dehydrogenase/reductase SDR family member 4, Retinol dehydrogenase 14, Retinol dehydrogenase 8                                                                                                                                                                                                                                                                                                                                                                                   | <i>APOD</i> (ligand), <i>PTGDS</i> (ligand), <i>RDH5</i> (substrate), <i>RDH12</i> (substrate), <i>ALDH1A2</i> (substrate), <i>ALDH1A1</i> (substrate), <i>LCAT</i> (substrate), <i>DHRS3</i> (substrate), <i>ALDH1A3</i> (substrate), <i>RETSAT</i> (substrate), <i>RDH11</i> (substrate), <i>DHRS4</i> (substrate), <i>RDH8</i> (substrate)                                                                                                                                                                                                  |
| coenzyme Q/ubiquinone                     |                                                                                                                                                                                                                                                                                                                                                               | NA                                               | NA                            | NADH dehydrogenase [ubiquinone] flavoprotein 3, mitochondrial, Succinate dehydrogenase [ubiquinone] flavoprotein subunit, mitochondrial                                                                                                                                                                                                                                                                                                                                                                                                                                                                                                                                                                                                                                                              | <i>NDUFV3</i> (cofactor), <i>SDHA</i> (cofactor)                                                                                                                                                                                                                                                                                                                                                                                                                                                                                               |
| Melatonin                                 |                                                                                                                                                                                                                                                                                                                                                               | Melatonin receptor                               | <i>MTNR1B</i> , <i>MTNR1A</i> | Melatonin receptor 1A, Melatonin receptor 1B, Estrogen receptor alpha, Nuclear receptor ROR-beta, Calmodulin, Myeloperoxidase, Eosinophil peroxidase, Calreticulin, Acetylserotonin O-methyltransferase, Ribosyldihydronicotinamide dehydrogenase [quinone]                                                                                                                                                                                                                                                                                                                                                                                                                                                                                                                                          | <i>MTNR1B</i> (agonist), <i>MTNR1A</i> (agonist), <i>ESR1</i> (antagonist), <i>RORB</i> (agonist), <i>CALM1</i> (NA), <i>MPO</i> (inhibitor), <i>EPX</i> (inhibitor), <i>CALR</i> (NA), <i>ASMT</i> (NA), <i>NQO2</i> (NA)                                                                                                                                                                                                                                                                                                                     |
| Piracetam                                 |                                                                                                                                                                                                                                                                                                                                                               | NA                                               | NA                            | NA                                                                                                                                                                                                                                                                                                                                                                                                                                                                                                                                                                                                                                                                                                                                                                                                   | NA                                                                                                                                                                                                                                                                                                                                                                                                                                                                                                                                             |
| Sulforaphane                              | Inhibit Keap1 protein through electrophilic modification, which leads to Nrf2 activation. The transcription factor Nrf2 plays a central role in the inducible expressions of many cytoprotective genes in response to oxidative stress                                                                                                                        | NA                                               | NA                            | NA                                                                                                                                                                                                                                                                                                                                                                                                                                                                                                                                                                                                                                                                                                                                                                                                   | NA                                                                                                                                                                                                                                                                                                                                                                                                                                                                                                                                             |
| DDO-7263                                  | Nrf2 activation and NLRP3 inflammasome inhibition                                                                                                                                                                                                                                                                                                             | NA                                               | NA                            | NA                                                                                                                                                                                                                                                                                                                                                                                                                                                                                                                                                                                                                                                                                                                                                                                                   | NA                                                                                                                                                                                                                                                                                                                                                                                                                                                                                                                                             |
| Salvianolic acid B                        | Salvianolic acid B like resveratrol is an activator of SIRT1 and an inhibitor of NF- $\kappa$ B                                                                                                                                                                                                                                                               | NA                                               | NA                            | NA                                                                                                                                                                                                                                                                                                                                                                                                                                                                                                                                                                                                                                                                                                                                                                                                   | NA                                                                                                                                                                                                                                                                                                                                                                                                                                                                                                                                             |
| NA: not applicable                        |                                                                                                                                                                                                                                                                                                                                                               |                                                  |                               |                                                                                                                                                                                                                                                                                                                                                                                                                                                                                                                                                                                                                                                                                                                                                                                                      |                                                                                                                                                                                                                                                                                                                                                                                                                                                                                                                                                |

| Table S2. Data sources in this study.                                                                                                                                                                                                 |                                                                                                               |                               |                       |                                    |
|---------------------------------------------------------------------------------------------------------------------------------------------------------------------------------------------------------------------------------------|---------------------------------------------------------------------------------------------------------------|-------------------------------|-----------------------|------------------------------------|
| Exposures                                                                                                                                                                                                                             | PMID/URL                                                                                                      | Ancestry                      | Dataset or consortium | Participants                       |
| <b>eQTL</b>                                                                                                                                                                                                                           | 32913098                                                                                                      | Predominantly European (~85%) | GTEx V8               |                                    |
| Brain - Amygdala                                                                                                                                                                                                                      |                                                                                                               |                               |                       | 152                                |
| Brain - Anterior cingulate cortex (BA24)                                                                                                                                                                                              |                                                                                                               |                               |                       | 176                                |
| Brain - Caudate (basal ganglia)                                                                                                                                                                                                       |                                                                                                               |                               |                       | 246                                |
| Brain - Cerebellar Hemisphere                                                                                                                                                                                                         |                                                                                                               |                               |                       | 215                                |
| Brain - Cerebellum                                                                                                                                                                                                                    |                                                                                                               |                               |                       | 241                                |
| Brain - Cortex                                                                                                                                                                                                                        |                                                                                                               |                               |                       | 255                                |
| Brain - Frontal Cortex (BA9)                                                                                                                                                                                                          |                                                                                                               |                               |                       | 209                                |
| Brain - Hippocampus                                                                                                                                                                                                                   |                                                                                                               |                               |                       | 197                                |
| Brain - Hypothalamus                                                                                                                                                                                                                  |                                                                                                               |                               |                       | 202                                |
| Brain - Nucleus accumbens (basal ganglia)                                                                                                                                                                                             |                                                                                                               |                               |                       | 246                                |
| Brain - Putamen (basal ganglia)                                                                                                                                                                                                       |                                                                                                               |                               |                       | 205                                |
| Brain - Spinal cord (cervical c-1)                                                                                                                                                                                                    |                                                                                                               |                               |                       | 159                                |
| Brain - Substantia nigra                                                                                                                                                                                                              |                                                                                                               |                               |                       | 139                                |
| <b>pQTL</b>                                                                                                                                                                                                                           |                                                                                                               |                               |                       |                                    |
| Dorsolateral prefrontal cortex                                                                                                                                                                                                        | 29865057                                                                                                      | European                      | ROSMAP                | 376                                |
| <b>Outcomes</b>                                                                                                                                                                                                                       |                                                                                                               |                               |                       |                                    |
| Schizophrenia                                                                                                                                                                                                                         | 35396580                                                                                                      | European                      | PGC                   | 53,386 cases and 77,258 controls   |
| Bipolar disorder                                                                                                                                                                                                                      | 34002096                                                                                                      | European                      | PGC                   | 41,917 cases and 371,549 controls  |
| Major depressive disorder                                                                                                                                                                                                             | 30718901                                                                                                      | European                      | PGC                   | 170,756 cases and 329,443 controls |
| Obsessive-compulsive disorder                                                                                                                                                                                                         | 28761083                                                                                                      | European                      | PGC                   | 2688 cases and 7037 controls       |
| Attention-deficit/hyperactivity disorder                                                                                                                                                                                              | 30478444                                                                                                      | European                      | PGC                   | 20,183 cases and 35,191 controls   |
| Autism spectrum disorder                                                                                                                                                                                                              | 30804558                                                                                                      | European                      | PGC                   | 18,381 cases and 27,969 controls   |
| Anorexia nervosa                                                                                                                                                                                                                      | 31308545                                                                                                      | European                      | PGC                   | 16,992 cases and 55,525 controls   |
| <b>Mediators</b>                                                                                                                                                                                                                      |                                                                                                               |                               |                       |                                    |
| Vitamin C                                                                                                                                                                                                                             | <a href="https://gwas.mrcieu.ac.uk/datasets/ukb-b-19390/">https://gwas.mrcieu.ac.uk/datasets/ukb-b-19390/</a> | European                      | UK biobank            | 64,979                             |
| Vitamin E                                                                                                                                                                                                                             | <a href="https://gwas.mrcieu.ac.uk/datasets/ukb-b-6888/">https://gwas.mrcieu.ac.uk/datasets/ukb-b-6888/</a>   | European                      | UK biobank            | 64,979                             |
| Fluid intelligence                                                                                                                                                                                                                    |                                                                                                               |                               |                       |                                    |
| Fluid intelligence score                                                                                                                                                                                                              | <a href="https://gwas.mrcieu.ac.uk/datasets/ukb-b-5238/">https://gwas.mrcieu.ac.uk/datasets/ukb-b-5238/</a>   | European                      | UK biobank            | 149,051                            |
| Trail marking                                                                                                                                                                                                                         |                                                                                                               |                               |                       |                                    |
| Duration to complete numeric path                                                                                                                                                                                                     | <a href="https://gwas.mrcieu.ac.uk/datasets/ukb-b-16026/">https://gwas.mrcieu.ac.uk/datasets/ukb-b-16026/</a> | European                      | UK biobank            | 99,479                             |
| Duration to complete alphanumeric path                                                                                                                                                                                                | <a href="https://gwas.mrcieu.ac.uk/datasets/ukb-b-20140/">https://gwas.mrcieu.ac.uk/datasets/ukb-b-20140/</a> | European                      | UK biobank            | 99,477                             |
| Pairs matching                                                                                                                                                                                                                        |                                                                                                               |                               |                       |                                    |
| Number of incorrect matches in round                                                                                                                                                                                                  | <a href="https://gwas.mrcieu.ac.uk/datasets/ukb-b-20498/">https://gwas.mrcieu.ac.uk/datasets/ukb-b-20498/</a> | European                      | UK biobank            | 462,302                            |
| Number of correct matches in round                                                                                                                                                                                                    | <a href="https://gwas.mrcieu.ac.uk/datasets/ukb-b-2084/">https://gwas.mrcieu.ac.uk/datasets/ukb-b-2084/</a>   | European                      | UK biobank            | 462,302                            |
| Numeric Memory                                                                                                                                                                                                                        |                                                                                                               |                               |                       |                                    |
| Maximum digits remembered correctly                                                                                                                                                                                                   | <a href="https://gwas.mrcieu.ac.uk/datasets/ukb-b-18683/">https://gwas.mrcieu.ac.uk/datasets/ukb-b-18683/</a> | European                      | UK biobank            | 106,162                            |
| Prospective Memory                                                                                                                                                                                                                    |                                                                                                               |                               |                       |                                    |
| Prospective memory result                                                                                                                                                                                                             | <a href="https://gwas.mrcieu.ac.uk/datasets/ukb-b-4282/">https://gwas.mrcieu.ac.uk/datasets/ukb-b-4282/</a>   | European                      | UK biobank            | 152,605                            |
| Expression quantitative trait loci, eQTL; protein quantitative trait loci, pQTL; Genotype-Tissue Expression, GTEx, version 8; Religious Orders Study and Rush Memory and Aging Project, ROSMAP; Psychiatric Genomics Consortium, PGC. |                                                                                                               |                               |                       |                                    |







**Table S6. Two-sample MR of the targets on attention-deficit/hyperactivity disorder.**

| Table S6. Two-sample MR of the targets on attention-deficit/hyperactivity disorder. |                      |                           |            |        |       |          |         |
|-------------------------------------------------------------------------------------|----------------------|---------------------------|------------|--------|-------|----------|---------|
|                                                                                     | SNPs                 | Test                      | SNP_number | Beta   | Se    | P_value  | Genes   |
| Vitamin C                                                                           |                      |                           |            |        |       |          |         |
| Amygdala                                                                            | rs6442126            | Wald ratio                | 1          | 0.129  | 0.064 | 4.48E-02 | P4HTM   |
| Anterior_cingulate_cortex                                                           |                      |                           |            |        |       |          |         |
|                                                                                     | rs10865952           | Wald ratio                | 1          | 0.224  | 0.103 | 2.93E-02 | P4HTM   |
| Cerebellar_Hemisphere                                                               |                      |                           |            |        |       |          |         |
|                                                                                     | rs4384984            | Wald ratio                | 1          | 0.156  | 0.056 | 5.57E-03 | P4HTM   |
|                                                                                     | rs4069668            | Wald ratio                | 1          | -0.165 | 0.079 | 3.71E-02 | OGFOD2  |
| Cerebellum                                                                          |                      |                           |            |        |       |          |         |
|                                                                                     | rs6769821            | Wald ratio                | 1          | 0.119  | 0.042 | 4.24E-03 | P4HTM   |
| Cortex                                                                              |                      |                           |            |        |       |          |         |
|                                                                                     | rs4955411            | Wald ratio                | 1          | 0.207  | 0.083 | 1.25E-02 | P4HTM   |
| Frontal_Cortex                                                                      |                      |                           |            |        |       |          |         |
|                                                                                     | rs13064784           | Wald ratio                | 1          | 0.209  | 0.071 | 3.49E-03 | P4HTM   |
| Hypothalamus                                                                        |                      |                           |            |        |       |          |         |
|                                                                                     | rs6446205            | Wald ratio                | 1          | 0.214  | 0.073 | 3.57E-03 | P4HTM   |
| Nucleus_accumbens                                                                   |                      |                           |            |        |       |          |         |
|                                                                                     | rs323717             | Wald ratio                | 1          | 0.185  | 0.069 | 7.29E-03 | P3H1    |
| Spinal_cord_cervical                                                                |                      |                           |            |        |       |          |         |
|                                                                                     | rs6791234            | Wald ratio                | 1          | 0.089  | 0.031 | 3.74E-03 | P4HTM   |
| ROSMAP                                                                              |                      |                           |            |        |       |          |         |
|                                                                                     | rs4379383            | Wald ratio                | 1          | 0.805  | 0.383 | 3.55E-02 | PLOD3   |
|                                                                                     | rs4955426            | Wald ratio                | 1          | -0.921 | 0.353 | 9.12E-03 | P4HTM   |
| NAC                                                                                 |                      |                           |            |        |       |          |         |
| Caudate_basal_ganglia                                                               |                      |                           |            |        |       |          |         |
|                                                                                     | rs12932206           | Wald ratio                | 1          | -0.115 | 0.051 | 2.37E-02 | GRIN2A  |
| Frontal_Cortex                                                                      |                      |                           |            |        |       |          |         |
|                                                                                     | rs7657780            | Wald ratio                | 1          | 0.254  | 0.111 | 2.15E-02 | SLC7A11 |
|                                                                                     | rs76300578           | Wald ratio                | 1          | 0.128  | 0.061 | 3.75E-02 | NFKB1   |
| Hippocampus                                                                         |                      |                           |            |        |       |          |         |
|                                                                                     | rs12932206           | Wald ratio                | 1          | -0.173 | 0.076 | 2.37E-02 | GRIN2A  |
| Putamen_basal_ganglia                                                               |                      |                           |            |        |       |          |         |
|                                                                                     | rs12932206           | Wald ratio                | 1          | -0.083 | 0.037 | 2.37E-02 | GRIN2A  |
| Spinal_cord_cervical                                                                |                      |                           |            |        |       |          |         |
|                                                                                     | rs12932206           | Wald ratio                | 1          | -0.048 | 0.021 | 2.37E-02 | GRIN2A  |
| ROSMAP                                                                              |                      |                           |            |        |       |          |         |
|                                                                                     | rs2236271            | Wald ratio                | 1          | 0.494  | 0.243 | 4.24E-02 | GSS     |
|                                                                                     | rs220593, rs10772724 | Inverse variance weighted | 2          | -1.019 | 0.494 | 3.91E-02 | GRIN2B  |
| Resveratrol                                                                         |                      |                           |            |        |       |          |         |
| Caudate_basal_ganglia                                                               |                      |                           |            |        |       |          |         |
|                                                                                     | rs9371563            | Wald ratio                | 1          | 0.153  | 0.059 | 9.64E-03 | ESR1    |
| Cortex                                                                              |                      |                           |            |        |       |          |         |
|                                                                                     | rs75756429           | Wald ratio                | 1          | 0.110  | 0.049 | 2.43E-02 | ESR1    |
| Frontal_Cortex                                                                      |                      |                           |            |        |       |          |         |
|                                                                                     | rs76369590           | Wald ratio                | 1          | 0.205  | 0.083 | 1.36E-02 | ITGA5   |
| Spinal_cord_cervical                                                                |                      |                           |            |        |       |          |         |
|                                                                                     | rs4371852            | Wald ratio                | 1          | 0.094  | 0.036 | 9.60E-03 | ESR1    |
| Melatonin                                                                           |                      |                           |            |        |       |          |         |
| Caudate_basal_ganglia                                                               |                      |                           |            |        |       |          |         |
| 13980                                                                               | rs9371563            | Wald ratio                | 1          | 0.153  | 0.059 | 9.64E-03 | ESR1    |
| Cortex                                                                              |                      |                           |            |        |       |          |         |
|                                                                                     | rs75756429           | Wald ratio                | 1          | 0.110  | 0.049 | 2.43E-02 | ESR1    |
| Spinal_cord_cervical                                                                |                      |                           |            |        |       |          |         |
|                                                                                     | rs4371852            | Wald ratio                | 1          | 0.094  | 0.036 | 9.60E-03 | ESR1    |
| Substantia_nigra                                                                    |                      |                           |            |        |       |          |         |
|                                                                                     | rs302864             | Wald ratio                | 1          | 0.074  | 0.033 | 2.44E-02 | EPX     |
| Vitamin E                                                                           |                      |                           |            |        |       |          |         |
| Cerebellum                                                                          |                      |                           |            |        |       |          |         |
| 14077                                                                               | rs77290814           | Wald ratio                | 1          | -0.296 | 0.146 | 4.21E-02 | PRKCA   |
| Vitamin D                                                                           |                      |                           |            |        |       |          |         |
| Spinal_cord_cervical                                                                |                      |                           |            |        |       |          |         |
|                                                                                     | rs886441             | Wald ratio                | 1          | -0.087 | 0.041 | 3.32E-02 | VDR     |
| Curcumin                                                                            |                      |                           |            |        |       |          |         |
| Spinal_cord_cervical                                                                |                      |                           |            |        |       |          |         |
|                                                                                     | rs886441             | Wald ratio                | 1          | -0.087 | 0.041 | 3.32E-02 | VDR     |
| NAC, N-Acetylcysteine                                                               |                      |                           |            |        |       |          |         |
| ROSMAP, Religious Orders Study and Rush Memory and Aging Project                    |                      |                           |            |        |       |          |         |

Table S7. Two-sample MR of the targets on autism spectrum disorder.

|                                                                  | NAC | SNPs        | Test       | SNP_number | Beta   | Se    | P_value  | Genes   |  |  |  |  |  |  |
|------------------------------------------------------------------|-----|-------------|------------|------------|--------|-------|----------|---------|--|--|--|--|--|--|
| Amygdala                                                         |     |             |            |            |        |       |          |         |  |  |  |  |  |  |
| Cerebellar_Hemisphere                                            |     | rs11644783  | Wald ratio | 1          | 0.187  | 0.069 | 6.88E-03 | GRIN2A  |  |  |  |  |  |  |
| Substantia_nigra                                                 |     | rs12003467  | Wald ratio | 1          | 0.084  | 0.033 | 1.17E-02 | GRIN3A  |  |  |  |  |  |  |
| Metformin                                                        |     | rs57283800  | Wald ratio | 1          | -0.288 | 0.114 | 1.13E-02 | GRIN1   |  |  |  |  |  |  |
| Anterior_cingulate_cortex                                        |     |             |            |            |        |       |          |         |  |  |  |  |  |  |
| Frontal_Cortex                                                   |     | rs72693373  | Wald ratio | 1          | 0.082  | 0.040 | 4.14E-02 | ETFDH   |  |  |  |  |  |  |
| Hypothalamus                                                     |     | rs10774515  | Wald ratio | 1          | -0.121 | 0.053 | 2.20E-02 | PRKAB1  |  |  |  |  |  |  |
| Nucleus_accumbens                                                |     | rs11100191  | Wald ratio | 1          | 0.065  | 0.031 | 3.70E-02 | ETFDH   |  |  |  |  |  |  |
| Substantia_nigra                                                 |     | rs67442921  | Wald ratio | 1          | 0.082  | 0.040 | 3.94E-02 | ETFDH   |  |  |  |  |  |  |
| Ginkgo biloba extract                                            |     | rs55822924  | Wald ratio | 1          | 0.068  | 0.032 | 3.34E-02 | ETFDH   |  |  |  |  |  |  |
| Caudate_basal ganglia                                            |     |             |            |            |        |       |          |         |  |  |  |  |  |  |
| Spinal_cord_cervical                                             |     | rs7706918   | Wald ratio | 1          | -0.287 | 0.145 | 4.75E-02 | GABRA1  |  |  |  |  |  |  |
| ROSMAP                                                           |     | rs114315666 | Wald ratio | 1          | 0.092  | 0.046 | 4.88E-02 | GABRA1  |  |  |  |  |  |  |
|                                                                  |     | rs4921381   | Wald ratio | 1          | -2.105 | 0.715 | 3.26E-03 | GABRB2  |  |  |  |  |  |  |
|                                                                  |     | rs4921420   | Wald ratio | 1          | 2.114  | 1.017 | 3.77E-02 | GABRA1  |  |  |  |  |  |  |
| Vitamin A                                                        |     |             |            |            |        |       |          |         |  |  |  |  |  |  |
| ROSMAP                                                           |     |             |            |            |        |       |          |         |  |  |  |  |  |  |
|                                                                  |     | rs1342022   | Wald ratio | 1          | -0.790 | 0.377 | 3.63E-02 | ALDH1A1 |  |  |  |  |  |  |
| Caudate_basal ganglia                                            |     |             |            |            |        |       |          |         |  |  |  |  |  |  |
| Cerebellar_Hemisphere                                            |     | rs5994305   | Wald ratio | 1          | 0.135  | 0.067 | 4.21E-02 | SEC14L2 |  |  |  |  |  |  |
| Frontal_Cortex                                                   |     | rs5753113   | Wald ratio | 1          | 0.169  | 0.062 | 6.67E-03 | SEC14L2 |  |  |  |  |  |  |
| Nucleus_accumbens                                                |     | rs4791035   | Wald ratio | 1          | 0.104  | 0.050 | 3.71E-02 | PRKCA   |  |  |  |  |  |  |
| Melatonin                                                        |     | rs5994306   | Wald ratio | 1          | 0.145  | 0.073 | 4.61E-02 | SEC14L2 |  |  |  |  |  |  |
| Cerebellum                                                       |     |             |            |            |        |       |          |         |  |  |  |  |  |  |
|                                                                  |     | rs514209    | Wald ratio | 1          | -0.146 | 0.064 | 2.27E-02 | RORB    |  |  |  |  |  |  |
| Cortex                                                           |     | rs75756429  | Wald ratio | 1          | 0.107  | 0.050 | 3.28E-02 | ESR1    |  |  |  |  |  |  |
| Substantia_nigra                                                 |     |             |            |            |        |       |          |         |  |  |  |  |  |  |
|                                                                  |     | rs302864    | Wald ratio | 1          | 0.070  | 0.033 | 3.13E-02 | EPX     |  |  |  |  |  |  |
| Resveratrol                                                      |     |             |            |            |        |       |          |         |  |  |  |  |  |  |
| Cortex                                                           |     |             |            |            |        |       |          |         |  |  |  |  |  |  |
|                                                                  |     | rs75756429  | Wald ratio | 1          | 0.107  | 0.050 | 3.28E-02 | ESR1    |  |  |  |  |  |  |
| Frontal_Cortex                                                   |     | rs16876611  | Wald ratio | 1          | 0.180  | 0.085 | 3.37E-02 | PI4K2B  |  |  |  |  |  |  |
| Hippocampus                                                      |     | rs1005696   | Wald ratio | 1          | -0.139 | 0.069 | 4.40E-02 | CBR1    |  |  |  |  |  |  |
| Hypothalamus                                                     |     | rs530425    | Wald ratio | 1          | 0.141  | 0.048 | 3.15E-03 | PPARG   |  |  |  |  |  |  |
| ROSMAP                                                           |     |             |            |            |        |       |          |         |  |  |  |  |  |  |
|                                                                  |     | rs2835267   | Wald ratio | 1          | 0.316  | 0.155 | 4.11E-02 | CBR1    |  |  |  |  |  |  |
|                                                                  |     | rs1811442   | Wald ratio | 1          | 1.322  | 0.607 | 2.93E-02 | SNCA    |  |  |  |  |  |  |
| Ubiquinone                                                       |     |             |            |            |        |       |          |         |  |  |  |  |  |  |
| Hippocampus                                                      |     |             |            |            |        |       |          |         |  |  |  |  |  |  |
|                                                                  |     | rs62345236  | Wald ratio | 1          | 0.234  | 0.090 | 9.11E-03 | SDHA    |  |  |  |  |  |  |
| Nucleus_accumbens                                                |     |             |            |            |        |       |          |         |  |  |  |  |  |  |
|                                                                  |     | rs55671190  | Wald ratio | 1          | 0.171  | 0.066 | 9.20E-03 | SDHA    |  |  |  |  |  |  |
| Spinal_cord_cervical                                             |     |             |            |            |        |       |          |         |  |  |  |  |  |  |
|                                                                  |     | rs62329990  | Wald ratio | 1          | 0.111  | 0.037 | 2.70E-03 | SDHA    |  |  |  |  |  |  |
| Vitamin C                                                        |     |             |            |            |        |       |          |         |  |  |  |  |  |  |
| Hippocampus                                                      |     |             |            |            |        |       |          |         |  |  |  |  |  |  |
|                                                                  |     | rs1416912   | Wald ratio | 1          | -0.140 | 0.059 | 1.81E-02 | EGLN1   |  |  |  |  |  |  |
| Nucleus_accumbens                                                |     |             |            |            |        |       |          |         |  |  |  |  |  |  |
|                                                                  |     | rs2739514   | Wald ratio | 1          | -0.142 | 0.069 | 3.92E-02 | EGLN1   |  |  |  |  |  |  |
| ROSMAP                                                           |     |             |            |            |        |       |          |         |  |  |  |  |  |  |
|                                                                  |     | rs6541266   | Wald ratio | 1          | 1.652  | 0.663 | 1.27E-02 | EGLN1   |  |  |  |  |  |  |
| Curcumin                                                         |     |             |            |            |        |       |          |         |  |  |  |  |  |  |
| Hippocampus                                                      |     |             |            |            |        |       |          |         |  |  |  |  |  |  |
|                                                                  |     | rs1005696   | Wald ratio | 1          | -0.139 | 0.069 | 4.40E-02 | CBR1    |  |  |  |  |  |  |
| Hypothalamus                                                     |     |             |            |            |        |       |          |         |  |  |  |  |  |  |
|                                                                  |     | rs530425    | Wald ratio | 1          | 0.141  | 0.048 | 3.15E-03 | PPARG   |  |  |  |  |  |  |
| Putamen_basal ganglia                                            |     |             |            |            |        |       |          |         |  |  |  |  |  |  |
|                                                                  |     | rs1554395   | Wald ratio | 1          | -0.158 | 0.071 | 2.58E-02 | ABCC5   |  |  |  |  |  |  |
| ROSMAP                                                           |     |             |            |            |        |       |          |         |  |  |  |  |  |  |
|                                                                  |     | rs2835267   | Wald ratio | 1          | 0.316  | 0.155 | 4.11E-02 | CBR1    |  |  |  |  |  |  |
| Omega-3                                                          |     |             |            |            |        |       |          |         |  |  |  |  |  |  |
| Hypothalamus                                                     |     |             |            |            |        |       |          |         |  |  |  |  |  |  |
|                                                                  |     | rs530425    | Wald ratio | 1          | 0.141  | 0.048 | 3.15E-03 | PPARG   |  |  |  |  |  |  |
| NAC, N-Acetyl/cysteine                                           |     |             |            |            |        |       |          |         |  |  |  |  |  |  |
| ROSMAP, Religious Orders Study and Rush Memory and Aging Project |     |             |            |            |        |       |          |         |  |  |  |  |  |  |

Table S8. Two-sample MR of the targets on obsessive-compulsive disorder.

| Table S8. Two-sample MR of the targets on obsessive-compulsive disorder. |                       |                           |            |        |       |          |                |
|--------------------------------------------------------------------------|-----------------------|---------------------------|------------|--------|-------|----------|----------------|
|                                                                          | SNPs                  | Test                      | SNP_number | Beta   | Se    | P_value  | Genes          |
| Vitamin C                                                                |                       |                           |            |        |       |          |                |
| Amygdala                                                                 | rs1375583             | Wald ratio                | 1          | -0.257 | 0.119 | 3.09E-02 | <i>PLOD2</i>   |
| Caudate_basal_ganglia                                                    | rs13088158            | Wald ratio                | 1          | -0.388 | 0.160 | 1.52E-02 | <i>PLOD2</i>   |
| Cerebellar_Hemisphere                                                    | rs4660653             | Wald ratio                | 1          | -0.466 | 0.190 | 1.42E-02 | <i>P3H1</i>    |
|                                                                          | rs7103602             | Wald ratio                | 1          | 0.299  | 0.151 | 4.78E-02 | <i>ALKBH3</i>  |
| Frontal_Cortex                                                           | rs45525835            | Wald ratio                | 1          | 0.688  | 0.273 | 1.18E-02 | <i>PLOD1</i>   |
|                                                                          | rs147289644           | Wald ratio                | 1          | -0.599 | 0.297 | 4.40E-02 | <i>BBOX1</i>   |
| Hypothalamus                                                             | rs727838              | Wald ratio                | 1          | -0.386 | 0.187 | 3.89E-02 | <i>BBOX1</i>   |
| Omega-3                                                                  |                       |                           |            |        |       |          |                |
| Anterior_cingulate_cortex                                                | rs12600694            | Wald ratio                | 1          | -0.475 | 0.204 | 1.97E-02 | <i>SREBF1</i>  |
| NAC                                                                      |                       |                           |            |        |       |          |                |
| Caudate_basal_ganglia                                                    | rs72640377            | Wald ratio                | 1          | 0.500  | 0.232 | 3.14E-02 | <i>IKBKB</i>   |
| Substantia_nigra                                                         | rs146318115           | Wald ratio                | 1          | -0.298 | 0.122 | 1.46E-02 | <i>GRIN2D</i>  |
| Cerebellum                                                               | rs1463132             | Wald ratio                | 1          | -0.316 | 0.137 | 2.10E-02 | <i>GRIN2A</i>  |
| Frontal_Cortex                                                           | rs76300578            | Wald ratio                | 1          | 0.334  | 0.153 | 2.89E-02 | <i>NFKB1</i>   |
| Hypothalamus                                                             | rs7198417             | Wald ratio                | 1          | 0.217  | 0.100 | 2.93E-02 | <i>GRIN2A</i>  |
| Ubiquinone                                                               |                       |                           |            |        |       |          |                |
| Putamen_basal_ganglia                                                    | rs55671190            | Wald ratio                | 1          | -0.325 | 0.156 | 3.70E-02 | <i>SDHA</i>    |
| Metformin                                                                |                       |                           |            |        |       |          |                |
| Caudate_basal_ganglia                                                    | rs1978108             | Wald ratio                | 1          | -0.405 | 0.150 | 6.84E-03 | <i>PRKAB1</i>  |
| Cerebellum                                                               | rs7310266             | Wald ratio                | 1          | -0.435 | 0.163 | 7.60E-03 | <i>PRKAB1</i>  |
| Putamen_basal_ganglia                                                    | rs7304996             | Wald ratio                | 1          | -0.343 | 0.129 | 7.60E-03 | <i>PRKAB1</i>  |
| ROSMAP                                                                   | rs278155              | Wald ratio                | 1          | -5.947 | 1.108 | 4.47E-03 | <i>PRKAB1</i>  |
| Resveratrol                                                              |                       |                           |            |        |       |          |                |
| Caudate_basal_ganglia                                                    | rs17552473            | Wald ratio                | 1          | -0.625 | 0.268 | 1.94E-02 | <i>MTNR1B</i>  |
| Cortex                                                                   | rs13198902            | Wald ratio                | 1          | -0.232 | 0.097 | 1.67E-02 | <i>NQO2</i>    |
| Hypothalamus                                                             | rs3732359             | Wald ratio                | 1          | -0.391 | 0.169 | 2.06E-02 | <i>NR1I2</i>   |
| Melatonin                                                                |                       |                           |            |        |       |          |                |
| Caudate_basal_ganglia                                                    | rs17552473            | Wald ratio                | 1          | -0.625 | 0.268 | 1.94E-02 | <i>MTNR1B</i>  |
| Cortex                                                                   | rs13198902            | Wald ratio                | 1          | -0.232 | 0.097 | 1.67E-02 | <i>NQO2</i>    |
| Spinal_cord_cervical                                                     | rs62082141            | Wald ratio                | 1          | -0.167 | 0.077 | 2.93E-02 | <i>MPO</i>     |
| Vitamin A                                                                |                       |                           |            |        |       |          |                |
| Cerebellar_Hemisphere                                                    | rs7146599             | Wald ratio                | 1          | 0.253  | 0.099 | 1.04E-02 | <i>DHRS4</i>   |
| Cerebellum                                                               | rs7146599             | Wald ratio                | 1          | 0.205  | 0.080 | 1.04E-02 | <i>DHRS4</i>   |
| Frontal_Cortex                                                           | rs150543773           | Wald ratio                | 1          | -0.297 | 0.117 | 1.11E-02 | <i>RDH11</i>   |
|                                                                          | rs11638367            | Wald ratio                | 1          | -0.301 | 0.104 | 3.81E-03 | <i>ALDH1A3</i> |
| Spinal_cord_cervical                                                     | rs6759239             | Wald ratio                | 1          | -0.335 | 0.154 | 2.95E-02 | <i>RETSAT</i>  |
| Ginkgo biloba extract                                                    |                       |                           |            |        |       |          |                |
| Cortex                                                                   | rs58977775            | Wald ratio                | 1          | -0.642 | 0.302 | 3.36E-02 | <i>GABRA1</i>  |
| Spinal_cord_cervical                                                     | rs606980              | Wald ratio                | 1          | -0.129 | 0.063 | 4.10E-02 | <i>PLA2G2A</i> |
| Vitamin E                                                                |                       |                           |            |        |       |          |                |
| Hippocampus                                                              | rs42937               | Wald ratio                | 1          | -0.287 | 0.143 | 4.52E-02 | <i>SEC14L2</i> |
| Hypothalamus                                                             | rs3732359             | Wald ratio                | 1          | -0.391 | 0.169 | 2.06E-02 | <i>NR1I2</i>   |
| ROSMAP                                                                   | rs2240422, rs11704395 | Inverse variance weighted | 2          | 1.232  | 1.710 | 4.51E-02 | <i>SEC14L2</i> |
| NAC, N-Acetylcysteine                                                    |                       |                           |            |        |       |          |                |
| ROSMAP, Religious Orders Study and Rush Memory and Aging Project         |                       |                           |            |        |       |          |                |

|                                                                  | SNPs        | Test       | SNP_number | Beta   | Se    | P_value  | Genes   |
|------------------------------------------------------------------|-------------|------------|------------|--------|-------|----------|---------|
| Resveratrol                                                      |             |            |            |        |       |          |         |
| Amygdala                                                         |             |            |            |        |       |          |         |
|                                                                  | rs77810888  | Wald ratio | 1          | 0.189  | 0.094 | 4.37E-02 | AHR     |
|                                                                  |             |            |            |        |       |          |         |
| Ubiquinone                                                       |             |            |            |        |       |          |         |
| Cerebellar_Hemisphere                                            |             |            |            |        |       |          |         |
|                                                                  | rs71320572  | Wald ratio | 1          | -0.122 | 0.051 | 1.66E-02 | NDUFV3  |
| Cerebellum                                                       |             |            |            |        |       |          |         |
|                                                                  | rs71320572  | Wald ratio | 1          | -0.114 | 0.047 | 1.66E-02 | NDUFV3  |
| Cortex                                                           |             |            |            |        |       |          |         |
|                                                                  | rs4148974   | Wald ratio | 1          | 0.220  | 0.098 | 2.43E-02 | NDUFV3  |
| Hypothalamus                                                     |             |            |            |        |       |          |         |
|                                                                  | rs4148974   | Wald ratio | 1          | 0.289  | 0.128 | 2.43E-02 | NDUFV3  |
| Nucleus_accumbens                                                |             |            |            |        |       |          |         |
|                                                                  | rs4148974   | Wald ratio | 1          | 0.239  | 0.106 | 2.43E-02 | NDUFV3  |
|                                                                  |             |            |            |        |       |          |         |
| Vitamin C                                                        |             |            |            |        |       |          |         |
| Cerebellum                                                       |             |            |            |        |       |          |         |
|                                                                  | rs8016136   | Wald ratio | 1          | 0.230  | 0.115 | 4.58E-02 | EGLN3   |
| Frontal_Cortex                                                   |             |            |            |        |       |          |         |
|                                                                  | rs75543548  | Wald ratio | 1          | 0.254  | 0.122 | 3.76E-02 | PHYH    |
| Nucleus_accumbens                                                |             |            |            |        |       |          |         |
|                                                                  | rs143658733 | Wald ratio | 1          | 0.242  | 0.090 | 7.31E-03 | DBH     |
|                                                                  | rs138098518 | Wald ratio | 1          | -0.236 | 0.119 | 4.76E-02 | OGFOD2  |
|                                                                  |             |            |            |        |       |          |         |
| Vitamin A                                                        |             |            |            |        |       |          |         |
| Cortex                                                           |             |            |            |        |       |          |         |
|                                                                  | rs12911338  | Wald ratio | 1          | -0.158 | 0.076 | 3.67E-02 | ALDH1A3 |
|                                                                  |             |            |            |        |       |          |         |
| Vitamin D                                                        |             |            |            |        |       |          |         |
| ROSMAP                                                           |             |            |            |        |       |          |         |
|                                                                  | rs222047    | Wald ratio | 1          | -0.600 | 0.305 | 4.97E-02 | GC      |
| NAC, N-Acetylcysteine                                            |             |            |            |        |       |          |         |
| ROSMAP, Religious Orders Study and Rush Memory and Aging Project |             |            |            |        |       |          |         |

Table S10. Mediation analysis.

| Target                                                                                                                                      | Mediator                                      | beta1         | se1          | p1              | method            | Disease    | beta2         | se2          | p2              | method                           | beta0         | proportion    |
|---------------------------------------------------------------------------------------------------------------------------------------------|-----------------------------------------------|---------------|--------------|-----------------|-------------------|------------|---------------|--------------|-----------------|----------------------------------|---------------|---------------|
| OGFOD2_Cerebellum                                                                                                                           | Vitamin c                                     | 0.018         | 0.030        | 5.37E-01        | Wald ratio        | SCZ        | 0.070         | 0.108        | 5.20E-01        | Inverse variance weighted        | -0.244        | -0.005        |
| <b>OGFOD2_Cerebellum</b>                                                                                                                    | <b>Fluid intelligence score</b>               | <b>0.179</b>  | <b>0.041</b> | <b>1.48E-05</b> | <b>Wald ratio</b> | <b>SCZ</b> | <b>0.170</b>  | <b>0.029</b> | <b>5.20E-09</b> | <b>Inverse variance weighted</b> | <b>-0.244</b> | <b>-0.111</b> |
| OGFOD2_Cerebellum                                                                                                                           | Duration to complete numeric path             | 0.028         | 0.024        | 2.48E-01        | Wald ratio        | SCZ        | -0.306        | 0.154        | 4.62E-02        | Inverse variance weighted        | -0.244        | 0.035         |
| OGFOD2_Cerebellum                                                                                                                           | Duration to complete alphanumeric path        | 0.013         | 0.024        | 5.96E-01        | Wald ratio        | SCZ        | -0.624        | 0.119        | 1.52E-07        | Inverse variance weighted        | -0.244        | 0.033         |
| <b>OGFOD2_Cerebellum</b>                                                                                                                    | <b>Number of incorrect matches in round</b>   | <b>-0.025</b> | <b>0.011</b> | <b>2.29E-02</b> | <b>Wald ratio</b> | <b>SCZ</b> | <b>-0.906</b> | <b>0.149</b> | <b>1.17E-09</b> | <b>Inverse variance weighted</b> | <b>-0.244</b> | <b>-0.086</b> |
| OGFOD2_Cerebellum                                                                                                                           | Number of correct matches in round            | 0.002         | 0.007        | 7.47E-01        | Wald ratio        | SCZ        | -0.072        | 0.406        | 8.58E-01        | Inverse variance weighted        | -0.244        | 0.00          |
| OGFOD2_Cerebellum                                                                                                                           | Maximum digits remembered correctly           | 0.070         | 0.052        | 1.76E-01        | Wald ratio        | SCZ        | -0.048        | 0.074        | 5.17E-01        | Inverse variance weighted        | -0.244        | 0.014         |
| OGFOD2_Cerebellum                                                                                                                           | Prospective memory result                     | -0.017        | 0.104        | 0.104E-01       | Wald ratio        | SCZ        | -0.484        | 0.262        | 6.50E-02        | Inverse variance weighted        | -0.244        | -0.032        |
| RORB_Cerebellum                                                                                                                             | Fluid intelligence score                      | 0.002         | 0.035        | 9.52E-01        | Wald ratio        | SCZ        | 0.170         | 0.029        | 5.20E-09        | Inverse variance weighted        | 0.234         | 0.002         |
| <b>RORB_Cerebellum</b>                                                                                                                      | <b>Duration to complete numeric path</b>      | <b>-0.058</b> | <b>0.021</b> | <b>5.47E-03</b> | <b>Wald ratio</b> | <b>SCZ</b> | <b>-0.306</b> | <b>0.154</b> | <b>4.62E-02</b> | <b>Inverse variance weighted</b> | <b>0.234</b>  | <b>0.076</b>  |
| <b>RORB_Cerebellum</b>                                                                                                                      | <b>Duration to complete alphanumeric path</b> | <b>-0.045</b> | <b>0.021</b> | <b>2.97E-02</b> | <b>Wald ratio</b> | <b>SCZ</b> | <b>-0.624</b> | <b>0.119</b> | <b>1.52E-07</b> | <b>Inverse variance weighted</b> | <b>0.234</b>  | <b>0.120</b>  |
| RORB_Cerebellum                                                                                                                             | Number of incorrect matches in round          | -0.009        | 0.009        | 3.54E-01        | Wald ratio        | SCZ        | -0.906        | 0.149        | 1.17E-09        | Inverse variance weighted        | 0.234         | 0.034         |
| RORB_Cerebellum                                                                                                                             | Number of correct matches in round            | -0.004        | 0.006        | 5.10E-01        | Wald ratio        | SCZ        | -0.072        | 0.406        | 8.58E-01        | Inverse variance weighted        | 0.234         | 0.001         |
| RORB_Cerebellum                                                                                                                             | Maximum digits remembered correctly           | 0.000         | 0.030        | 9.87E-01        | Wald ratio        | SCZ        | -0.048        | 0.074        | 5.17E-01        | Inverse variance weighted        | 0.234         | 0.000         |
| RORB_Cerebellum                                                                                                                             | Prospective memory result                     | 0.012         | 0.009        | 1.89E-01        | Wald ratio        | SCZ        | -0.484        | 0.262        | 6.50E-02        | Inverse variance weighted        | 0.234         | -0.023        |
| PRKCB_ROSMAP                                                                                                                                | Vitamin e                                     | 0.127         | 0.171        | 4.57E-01        | Inverse var       | BD         | 0.007         | 0.081        | 9.27E-01        | Inverse variance weighted        | -1.448        | -0.001        |
| PRKCB_ROSMAP                                                                                                                                | Fluid intelligence score                      | -0.174        | 0.335        | 6.05E-01        | Inverse var       | BD         | 0.035         | 0.024        | 1.49E-01        | Inverse variance weighted        | -1.448        | 0.004         |
| PRKCB_ROSMAP                                                                                                                                | Duration to complete numeric path             | -0.040        | 0.140        | 7.73E-01        | Inverse var       | BD         | -0.142        | 0.105        | 1.78E-01        | Inverse variance weighted        | -1.448        | -0.004        |
| PRKCB_ROSMAP                                                                                                                                | Duration to complete alphanumeric path        | 0.002         | 0.139        | 9.88E-01        | Inverse var       | BD         | -0.288        | 0.086        | 8.03E-04        | Inverse variance weighted        | -1.448        | 0.000         |
| PRKCB_ROSMAP                                                                                                                                | Number of incorrect matches in round          | -0.020        | 0.163        | 9.03E-01        | Inverse var       | BD         | -0.548        | 0.116        | 2.21E-06        | Inverse variance weighted        | -1.448        | -0.007        |
| PRKCB_ROSMAP                                                                                                                                | Number of correct matches in round            | -0.015        | 0.040        | 7.03E-01        | Inverse var       | BD         | 0.187         | 0.295        | 5.26E-01        | Inverse variance weighted        | -1.448        | -0.002        |
| PRKCB_ROSMAP                                                                                                                                | Maximum digits remembered correctly           | 0.247         | 0.216        | 2.53E-01        | Inverse var       | BD         | 0.005         | 0.060        | 9.40E-01        | Inverse variance weighted        | -1.448        | -0.001        |
| PRKCB_ROSMAP                                                                                                                                | Prospective memory result                     | 0.014         | 0.059        | 8.11E-01        | Inverse var       | BD         | -0.309        | 0.185        | 9.45E-02        | Inverse variance weighted        | -1.448        | 0.003         |
| P4HTM_Cerebellum                                                                                                                            | Vitamin c                                     | 0.000         | 0.017        | 9.78E-01        | Wald ratio        | MDD        | -0.039        | 0.050        | 4.33E-01        | Inverse variance weighted        | 0.069         | 0.000         |
| <b>P4HTM_Cerebellum</b>                                                                                                                     | <b>Fluid intelligence score</b>               | <b>0.050</b>  | <b>0.024</b> | <b>3.70E-02</b> | <b>Wald ratio</b> | <b>MDD</b> | <b>-0.029</b> | <b>0.011</b> | <b>7.01E-03</b> | <b>Inverse variance weighted</b> | <b>0.069</b>  | <b>-0.021</b> |
| <b>P4HTM_Cerebellum</b>                                                                                                                     | <b>Duration to complete numeric path</b>      | <b>-0.036</b> | <b>0.014</b> | <b>1.00E-02</b> | <b>Wald ratio</b> | <b>MDD</b> | <b>0.109</b>  | <b>0.053</b> | <b>4.10E-02</b> | <b>Inverse variance weighted</b> | <b>0.069</b>  | <b>-0.054</b> |
| <b>P4HTM_Cerebellum</b>                                                                                                                     | <b>Duration to complete alphanumeric path</b> | <b>-0.053</b> | <b>0.014</b> | <b>1.53E-04</b> | <b>Wald ratio</b> | <b>MDD</b> | <b>0.110</b>  | <b>0.042</b> | <b>8.07E-03</b> | <b>Inverse variance weighted</b> | <b>0.069</b>  | <b>-0.079</b> |
| <b>P4HTM_Cerebellum</b>                                                                                                                     | <b>Number of incorrect matches in round</b>   | <b>-0.018</b> | <b>0.006</b> | <b>6.20E-03</b> | <b>Wald ratio</b> | <b>MDD</b> | <b>0.219</b>  | <b>0.053</b> | <b>3.28E-05</b> | <b>Inverse variance weighted</b> | <b>0.069</b>  | <b>-0.053</b> |
| P4HTM_Cerebellum                                                                                                                            | Number of correct matches in round            | 0.008         | 0.004        | 4.97E-02        | Wald ratio        | MDD        | -0.267        | 0.158        | 9.07E-02        | Inverse variance weighted        | 0.069         | -0.030        |
| P4HTM_Cerebellum                                                                                                                            | Maximum digits remembered correctly           | 0.004         | 0.020        | 8.46E-01        | Wald ratio        | MDD        | 0.015         | 0.031        | 6.31E-01        | Inverse variance weighted        | 0.069         | 0.001         |
| P4HTM_Cerebellum                                                                                                                            | Prospective memory result                     | -0.001        | 0.006        | 8.69E-01        | Wald ratio        | MDD        | 0.073         | 0.076        | 3.33E-01        | Inverse variance weighted        | 0.069         | -0.001        |
| P4HTM_Cerebellar_H                                                                                                                          | Vitamin c                                     | 0.003         | 0.023        | 9.08E-01        | Wald ratio        | MDD        | -0.039        | 0.050        | 4.33E-01        | Inverse variance weighted        | 0.088         | -0.001        |
| <b>P4HTM_Cerebellar_H</b>                                                                                                                   | <b>Fluid intelligence score</b>               | <b>0.072</b>  | <b>0.032</b> | <b>2.46E-02</b> | <b>Wald ratio</b> | <b>MDD</b> | <b>-0.029</b> | <b>0.011</b> | <b>7.01E-03</b> | <b>Inverse variance weighted</b> | <b>0.088</b>  | <b>-0.024</b> |
| <b>P4HTM_Cerebellar_H</b>                                                                                                                   | <b>Duration to complete numeric path</b>      | <b>-0.051</b> | <b>0.019</b> | <b>7.24E-03</b> | <b>Wald ratio</b> | <b>MDD</b> | <b>0.109</b>  | <b>0.053</b> | <b>4.10E-02</b> | <b>Inverse variance weighted</b> | <b>0.088</b>  | <b>-0.060</b> |
| <b>P4HTM_Cerebellar_H</b>                                                                                                                   | <b>Duration to complete alphanumeric path</b> | <b>-0.075</b> | <b>0.019</b> | <b>8.59E-05</b> | <b>Wald ratio</b> | <b>MDD</b> | <b>0.110</b>  | <b>0.042</b> | <b>8.07E-03</b> | <b>Inverse variance weighted</b> | <b>0.088</b>  | <b>-0.086</b> |
| <b>P4HTM_Cerebellar_H</b>                                                                                                                   | <b>Number of incorrect matches in round</b>   | <b>-0.024</b> | <b>0.009</b> | <b>5.94E-03</b> | <b>Wald ratio</b> | <b>MDD</b> | <b>0.219</b>  | <b>0.053</b> | <b>3.28E-05</b> | <b>Inverse variance weighted</b> | <b>0.088</b>  | <b>-0.056</b> |
| P4HTM_Cerebellar_H                                                                                                                          | Number of correct matches in round            | 0.012         | 0.005        | 3.42E-02        | Wald ratio        | MDD        | -0.267        | 0.158        | 9.07E-02        | Inverse variance weighted        | 0.088         | -0.034        |
| P4HTM_Cerebellar_H                                                                                                                          | Maximum digits remembered correctly           | 0.004         | 0.027        | 8.82E-01        | Wald ratio        | MDD        | 0.015         | 0.031        | 6.31E-01        | Inverse variance weighted        | 0.088         | 0.001         |
| P4HTM_Cerebellar_H                                                                                                                          | Prospective memory result                     | -0.004        | 0.008        | 6.00E-01        | Wald ratio        | MDD        | 0.073         | 0.076        | 3.33E-01        | Inverse variance weighted        | 0.088         | -0.003        |
| ROSMAP, Religious Orders Study and Rush Memory and Aging Project; SCZ, schizophrenia; BD, bipolar disorder; MDD, major depressive disorder. |                                               |               |              |                 |                   |            |               |              |                 |                                  |               |               |
